# Supplementary material
Source: PubMed Central journal article supplement (PMC7716167)
Supplement: ajcr0010-3815-f7.pdf [file ajcr0010-3815-f7.pdf]

## Tubal ciliated cell loss represents a risk for ovarian cancer

**Table S1.1.** Clinical information of patients with low risk (benign control)

| # Patients | Mean Age | Reasons for Surgical Resection (%) |             |                     |                         |
|------------|----------|------------------------------------|-------------|---------------------|-------------------------|
|            |          | Leiomyomata                        | Adenomyosis | Benign Ovarian Cyst | Other benign conditions |
| 120        | 48       | 39 (32.5%)                         | 15 (12.5%)  | 28 (23.3%)          | 38 (31.7%)              |

Other benign conditions included ovarian endometriosis, paratubal cysts, mucinous cystadenomas, benign Brenner tumors, mesothelial inclusion cysts, and chronic pelvic pain.

**Table S1.2.** Clinical information of patients with high risk

| #Patients | Mean Age | BRCA1+     | BRCA2+    | Reasons for Surgical Resection (%) |                                  |
|-----------|----------|------------|-----------|------------------------------------|----------------------------------|
|           |          |            |           | Personal Breast Cancer history     | Family history of Ovarian Cancer |
| 60        | 45       | 25 (41.7%) | 7 (11.7%) | 20 (33.3%)                         | 8 (13.3%)                        |

BRCA1+: germline mutation of breast cancer susceptibility gene 1; BRCA2+: germline mutation of breast cancer susceptibility gene 2.

**Table S1.3.** Clinical information of patients with high-grade serous carcinoma of the ovary or the peritoneum

| # Patients | Mean Age | Clinical Stage (International Federation of Obstetrics and Gynecology) |           |            |          |
|------------|----------|------------------------------------------------------------------------|-----------|------------|----------|
|            |          | Stage I                                                                | Stage II  | Stage III  | Stage IV |
| 60         | 61       | 0 (0.0%)                                                               | 6 (10.0%) | 49 (81.7%) | 5 (8.3%) |

**Table S2.** Tubal ciliated cell change among women in different age by microscopy (H&E)

| Age                      | 20-29<br>(n=14) | 30-39<br>(n=29) | 40-49<br>(n=48) | 50-59<br>(n=64) | 60-69<br>(n=42) | 70-79<br>(n=37) | >80<br>(n=6) |
|--------------------------|-----------------|-----------------|-----------------|-----------------|-----------------|-----------------|--------------|
| #CC, Fimbria (Mean ± SD) | 258 (80.4)      | 212 (55.9)      | 165 (32.6)      | 128 (42.0)      | 56 (21.5)       | 32 (17.6)       | 15 (9.5)     |
| #CC, Ampulla (Mean ± SD) | 260 (78.2)      | 243 (99.4)      | 188 (49.3)      | 156 (30.0)      | 85 (25.3)       | 52 (13.5)       | 48 (22.3)    |

#CC: average number of ciliated cells within the tubal segment. There is a clear trend that the number of ciliated cells decreases as a function of age in both fimbria and ampulla segments. Standard deviations and *p* values are shown in the corresponding bar graph in **Figure 1**.

**Table S3.** The number of ciliated cells in tubal fimbria and ampulla segments detected by tubulin stains (IHC)

| #case            | Mean age | #Ciliated Cells (fimbria) |             |                | #Ciliated Cells (ampulla) |            |                                 |
|------------------|----------|---------------------------|-------------|----------------|---------------------------|------------|---------------------------------|
|                  |          | Number                    | Percentage  | <i>P</i> value | Number                    | Percentage | <i>P</i> value                  |
| Low-risk (± SD)  | 60       | 48 (3.6)                  | 236 (101.4) | 59%            | 248 (89.9)                | 61.5%      |                                 |
| High-risk (± SD) | 30       | 45 (2.8)                  | 118 (24.9)  | 29.5%          | 126 (33.8)                | 31.5%      | <i>P</i> < 0.001 (vs. Low-risk) |
| O/PSC (± SD)     | 30       | 61 (4.1)                  | 156 (46.5)  | 39%            | 139 (50.9)                | 34.8%      | <i>P</i> < 0.001 (vs. Low-risk) |

Standard deviations and *p* values are shown in the corresponding bar graph in **Figure 2**. Statistically significant differences were determined using the Mann-Whitney U test.

## Tubal ciliated cell loss represents a risk for ovarian cancer

**Table S4.** Decreased number of tubal ciliated cells significantly associated with age, high-risk factors, and the status of ovarian or pelvic serous carcinoma

| Age (Mean ± SD) | Low-risk (n=120) |         | High-risk (n=60) |         | O/PSC (n=60) |         |
|-----------------|------------------|---------|------------------|---------|--------------|---------|
|                 | fimbria          | ampulla | fimbria          | ampulla | fimbria      | ampulla |
| 20-29 (25±2.1)  | 258              | 260     | -                | -       | -            | -       |
| 30-39(34±1.7)   | 227              | 240     | 182              | 190     | -            | -       |
| 40-49 (46±1.8)  | 182              | 195     | 137              | 128     | 147          | 139     |
| 50-59 (55±1.6)  | 135              | 162     | 96               | 91      | 126          | 115     |
| 60-69 (63±2.2)  | 86               | 120     | 55               | 61      | 110          | 118     |
| 70-79 (76±125)  | 63               | 76      | 28               | 30      | 46           | 51      |
| > 80 (84±1.5)   | 42               | 58      | -                | -       | 10           | 15      |

O/PSC: ovarian or pelvic serous carcinoma. There was no high-risk case with age elder than 80 and no O/PSC case younger than 40 in this study. There were only 6 O/PSC cases with age elder than 80. Standard deviations are shown in the corresponding bar graph in **Figure 3**.
